# Supplementary material for: Predicting hydration Gibbs energies of alkyl-aromatics using molecular simulation: a comparison of current force fields and the development of a new parameter set for accurate solvation data
Source: Royal Society of Chemistry journal article supplement (doi:10.1039/c1cp21245a), 2011-01-01
Supplement: c1cp21245a.pdf [file c1cp21245a.pdf]

Supporting Information:

**Predicting Hydration Gibbs Energies of Alkyl-aromatics Using  
Molecular Simulation: A Comparison of Current Force Fields and the  
Development of a New Parameter Set for Accurate Solvation Data**

Nuno M. Garrido<sup>1</sup>, Miguel Jorge<sup>1</sup>, António J. Queimada<sup>1</sup>, José R. B. Gomes<sup>2</sup>,

Ioannis G. Economou<sup>3</sup> and Eugénia A. Macedo<sup>1,\*</sup>

1. LSRE Laboratory of Separation and Reaction Engineering, Departamento de Engenharia Química, Faculdade de Engenharia, Universidade do Porto, Rua do Dr. Roberto Frias, 4200 - 465 Porto, Portugal

2. CICECO, Department of Chemistry, University of Aveiro, Campus Universitário de Santiago, Aveiro 3810-193, Portugal

3. The Petroleum Institute, Department of Chemical Engineering, PO Box 2533, Abu Dhabi, United Arab Emirates

\* Author to whom all correspondence should be addressed at: [eamacedo@fe.up.pt](mailto:eamacedo@fe.up.pt).

**Table S1:** LJ and electrostatic contributions to the predicted hydration Gibbs energies of benzene and linear alkylbenzenes using the TraPPE-UA force field. All data in kJ/mol. The subscripts give the statistical accuracy of the last decimal point shown. Abbreviations as detailed in the main manuscript.

| Solute | $\Delta G^{LJ}$   | $\Delta G^C$       | $\Delta_{hyd} G^{sim}$ | $\Delta_{hyd} G^{exp}$ |
|--------|-------------------|--------------------|------------------------|------------------------|
| BZ     | 4.5 <sub>5</sub>  | 0                  | 4.5 <sub>5</sub>       | -3.62                  |
| MB     | 5.5 <sub>6</sub>  | 0                  | 5.5 <sub>6</sub>       | -3.71                  |
| EB     | 6.6 <sub>6</sub>  | 0                  | 6.6 <sub>6</sub>       | -3.33                  |
| PB     | 7.1 <sub>10</sub> | 0                  | 7.1 <sub>10</sub>      | -2.23                  |
| BB     | 7.9 <sub>9</sub>  | 0                  | 7.9 <sub>9</sub>       | -1.66                  |
| PeB    | 9.1 <sub>6</sub>  | 0                  | 9.1 <sub>6</sub>       | -0.96                  |
| AAD    |                   |                    |                        | <b>9.4<sub>6</sub></b> |
|        |                   |                    |                        |                        |
| BZ*    | 5.5 <sub>5</sub>  | -5.04 <sub>9</sub> | 0.5 <sub>5</sub>       | -3.62                  |
| AAD    |                   |                    |                        | <b>4.2</b>             |

\* Considering an explicit hydrogen description of the aromatic ring.

**Table S2:** LJ and electrostatic contributions to the predicted hydration Gibbs energies of benzene and linear alkylbenzenes using the OPLS-AA force field. All data in kJ/mol. The subscripts give the statistical accuracy of the last decimal point shown.

| Solute | $\Delta G^{LJ}$   | $\Delta G^C$        | $\Delta_{hyd} G^{sim}$ | $\Delta_{hyd} G^{exp}$ |
|--------|-------------------|---------------------|------------------------|------------------------|
| BZ     | 6.8 <sub>2</sub>  | -8.2 <sub>1</sub>   | -1.4 <sub>2</sub>      | -3.62                  |
| MB     | 12.1 <sub>5</sub> | -12.24 <sub>8</sub> | -0.1 <sub>5</sub>      | -3.71                  |
| EB     | 16.4 <sub>4</sub> | -11.70 <sub>8</sub> | 4.7 <sub>4</sub>       | -3.33                  |
| PB     | 19.4 <sub>4</sub> | -11.17 <sub>8</sub> | 8.2 <sub>4</sub>       | -2.23                  |
| BB     | 22.0 <sub>5</sub> | -11.18 <sub>8</sub> | 10.8 <sub>5</sub>      | -1.66                  |
| PeB    | 26.3 <sub>2</sub> | -11.09 <sub>8</sub> | 15.2 <sub>2</sub>      | -0.96                  |
| AAD    |                   |                     |                        | <b>8.8 ± 4.9</b>       |

**Table S3:** LJ and electrostatic contributions to the predicted hydration Gibbs energies of benzene and linear alkylbenzenes using the Gromos-EH force field. All data in kJ/mol. The subscripts give the statistical accuracy of the last decimal point shown.

| Solute | $\Delta G^{LJ}$   | $\Delta G^C$        | $\Delta_{hyd} G^{sim}$ | $\Delta_{hyd} G^{exp}$ |
|--------|-------------------|---------------------|------------------------|------------------------|
| BZ     | 7.6 <sub>5</sub>  | -12.66 <sub>8</sub> | -5.2 <sub>5</sub>      | -3.62                  |
| MB     | 7.9 <sub>4</sub>  | -9.23 <sub>7</sub>  | -1.4 <sub>4</sub>      | -3.71                  |
| EB     | 8.7 <sub>6</sub>  | -9.53 <sub>7</sub>  | -0.8 <sub>6</sub>      | -3.33                  |
| PB     | 9.0 <sub>6</sub>  | -9.44 <sub>7</sub>  | -0.5 <sub>6</sub>      | -2.23                  |
| BB     | 9.9 <sub>7</sub>  | -9.54 <sub>7</sub>  | 0.3 <sub>7</sub>       | -1.66                  |
| PeB    | 10.7 <sub>8</sub> | -9.49 <sub>7</sub>  | 1.2 <sub>8</sub>       | -0.96                  |
| AAD    |                   |                     |                        | <b>2.1 ± 0.3</b>       |

**Table S4:** LJ and electrostatic contributions to the predicted hydration Gibbs energies of benzene and linear alkylbenzenes using the Gromos-UA force field. All data in kJ/mol. The subscripts give the statistical accuracy of the last decimal point shown.

| Solute | $\Delta G^{LJ}$  | $\Delta G^C$ | $\Delta_{hyd} G^{sim}$ | $\Delta_{hyd} G^{exp}$ |
|--------|------------------|--------------|------------------------|------------------------|
| BZ     | 1.7 <sub>6</sub> | 0            | 1.7 <sub>6</sub>       | -3.62                  |
| MB     | 2.5 <sub>3</sub> | 0            | 2.5 <sub>3</sub>       | -3.71                  |
| EB     | 3.3 <sub>3</sub> | 0            | 3.3 <sub>3</sub>       | -3.33                  |
| PB     | 4.0 <sub>3</sub> | 0            | 4.0 <sub>3</sub>       | -2.23                  |
| BB     | 4.1 <sub>8</sub> | 0            | 4.1 <sub>8</sub>       | -1.66                  |
| PeB    | 4.5 <sub>9</sub> | 0            | 4.5 <sub>9</sub>       | -0.96                  |
|        |                  |              | AAD                    | <b>5.9 ± 0.4</b>       |

**Tables S5-S12:** CHelpG and NPA charges for the different molecules studied

• **Table S5:** Benzene (BZ)

| Atom           | CHelpG      | NPA    |
|----------------|-------------|--------|
| C <sub>1</sub> | (4x) -0.062 | -0.245 |
| C <sub>2</sub> | (2x) -0.103 |        |
| H <sub>1</sub> | (4x) 0.072  | 0.245  |
| H <sub>2</sub> | (2x) 0.085  |        |

• **Table S6:** Toluene (MB)

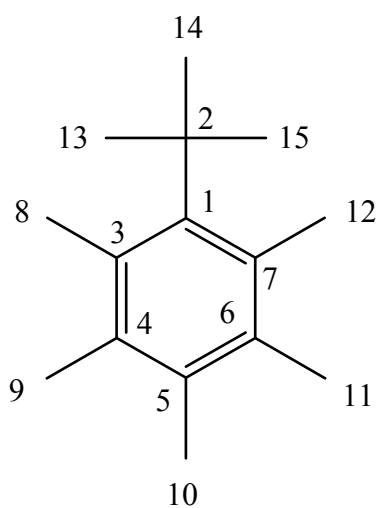

| Atom# | CHelpG | NPA    | Atom# | CHelpG | NPA    | Atom# | CHelpG | NPA   |
|-------|--------|--------|-------|--------|--------|-------|--------|-------|
| 1     | 0.212  | -0.042 | 6     | -0.026 | -0.238 | 11    | 0.072  | 0.245 |
| 2     | -0.223 | -0.709 | 7     | -0.203 | -0.241 | 12    | 0.098  | 0.240 |
| 3     | -0.212 | -0.240 | 8     | 0.109  | 0.240  | 13    | 0.066  | 0.245 |
| 4     | -0.020 | -0.238 | 9     | 0.069  | 0.245  | 14    | 0.059  | 0.252 |
| 5     | -0.155 | -0.254 | 10    | 0.094  | 0.245  | 15    | 0.059  | 0.252 |

• **Table S7:** Ethylbenzene (EB)

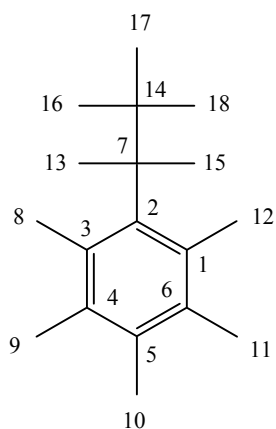

| Atom# | CHelpG | NPA    | Atom# | CHelpG | NPA    | Atom# | CHelpG | NPA    |
|-------|--------|--------|-------|--------|--------|-------|--------|--------|
| 1     | -0.167 | -0.239 | 7     | 0.033  | -0.488 | 13    | -0.016 | 0.247  |
| 2     | 0.093  | -0.036 | 8     | 0.105  | 0.240  | 14    | 0.164  | -0.690 |
| 3     | -0.167 | -0.239 | 9     | 0.075  | 0.245  | 15    | -0.016 | 0.246  |
| 4     | -0.063 | -0.239 | 10    | 0.080  | 0.245  | 16    | -0.035 | 0.239  |
| 5     | -0.096 | -0.253 | 11    | 0.075  | 0.245  | 17    | -0.054 | 0.239  |
| 6     | -0.063 | -0.239 | 12    | 0.105  | 0.245  | 18    | -0.054 | 0.239  |

• **Table S8:** Propylbenzene (PB)

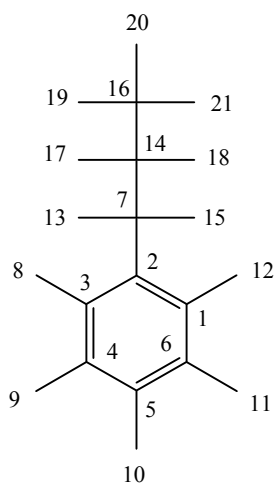

| Atom# | CHelpG | NPA    | Atom# | CHelpG | NPA    | Atom# | CHelpG | NPA    |
|-------|--------|--------|-------|--------|--------|-------|--------|--------|
| 1     | -0.134 | -0.239 | 8     | 0.099  | 0.240  | 15    | 0.022  | 0.245  |
| 2     | 0.096  | -0.035 | 9     | 0.081  | 0.245  | 16    | -0.137 | -0.699 |
| 3     | -0.134 | -0.239 | 10    | 0.079  | 0.245  | 17    | -0.144 | 0.239  |
| 4     | -0.091 | -0.239 | 11    | 0.080  | 0.245  | 18    | -0.114 | 0.239  |
| 5     | -0.079 | -0.253 | 12    | 0.099  | 0.240  | 19    | 0.013  | 0.244  |
| 6     | -0.091 | -0.239 | 13    | 0.022  | 0.245  | 20    | 0.015  | 0.235  |
| 7     | -0.155 | -0.480 | 14    | 0.429  | -0.472 | 21    | 0.015  | 0.235  |

• **Table S9:** Ortho-xylene (OX)

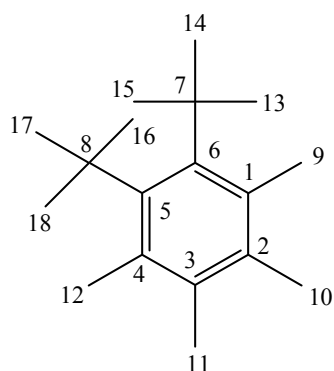

| Atom# | CHelpG | NPA    | Atom# | CHelpG | NPA    | Atom# | CHelpG | NPA   |
|-------|--------|--------|-------|--------|--------|-------|--------|-------|
| 1     | -0.210 | -0.233 | 7     | -0.176 | -0.708 | 13    | 0.051  | 0.247 |
| 2     | -0.071 | -0.247 | 8     | -0.176 | -0.708 | 14    | 0.054  | 0.249 |
| 3     | -0.071 | -0.247 | 9     | 0.114  | 0.239  | 15    | 0.054  | 0.249 |
| 4     | -0.210 | -0.233 | 10    | 0.077  | 0.244  | 16    | 0.051  | 0.247 |
| 5     | 0.106  | -0.039 | 11    | 0.077  | 0.244  | 17    | 0.054  | 0.249 |
| 6     | 0.106  | -0.039 | 12    | 0.114  | 0.239  | 18    | 0.054  | 0.249 |



• **Table S10:** Meta-xylene (MX)

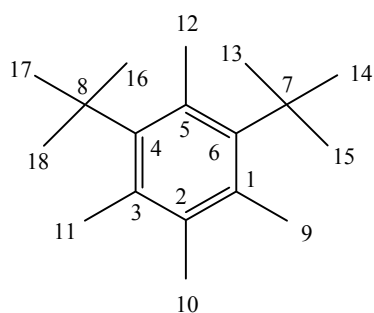

| Atom# | CHelpG | NPA    | Atom# | CHelpG | NPA    | Atom# | CHelpG | NPA   |
|-------|--------|--------|-------|--------|--------|-------|--------|-------|
| 1     | -0.247 | -0.250 | 7     | -0.149 | -0.708 | 13    | 0.042  | 0.248 |
| 2     | -0.009 | -0.231 | 8     | -0.130 | -0.708 | 14    | 0.041  | 0.246 |
| 3     | -0.250 | -0.250 | 9     | 0.115  | 0.240  | 15    | 0.044  | 0.253 |
| 4     | 0.215  | -0.035 | 10    | 0.074  | 0.244  | 16    | 0.035  | 0.247 |
| 5     | -0.327 | -0.237 | 11    | 0.115  | 0.240  | 17    | 0.040  | 0.253 |
| 6     | 0.22   | -0.035 | 12    | 0.134  | 0.235  | 18    | 0.037  | 0.247 |

• **Table S11:** Para-xylene (PX)

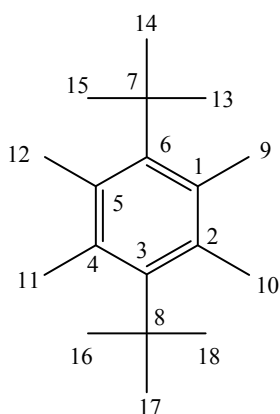

| Atom# | CHelpG | NPA    | Atom# | CHelpG | NPA    | Atom# | CHelpG | NPA   |
|-------|--------|--------|-------|--------|--------|-------|--------|-------|
| 1     | -0.173 | -0.233 | 7     | -0.172 | -0.707 | 13    | 0.048  | 0.247 |
| 2     | -0.179 | -0.233 | 8     | -0.165 | -0.707 | 14    | 0.050  | 0.252 |
| 3     | 0.166  | -0.051 | 9     | 0.105  | 0.239  | 15    | 0.048  | 0.247 |
| 4     | -0.179 | -0.233 | 10    | 0.106  | 0.239  | 16    | 0.046  | 0.247 |
| 5     | -0.171 | -0.233 | 11    | 0.106  | 0.239  | 17    | 0.049  | 0.252 |
| 6     | 0.162  | -0.051 | 12    | 0.105  | 0.239  | 18    | 0.046  | 0.247 |

• **Table S12:** 1,3,5-Trimethylbenzene (TMB)

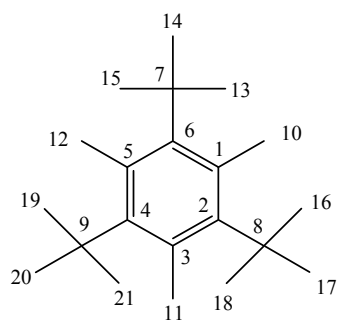

| Atom# | CHelpG | NPA    | Atom# | CHelpG | NPA    | Atom# | CHelpG | NPA   |
|-------|--------|--------|-------|--------|--------|-------|--------|-------|
| 1     | -0.379 | -0.245 | 8     | -0.171 | -0.707 | 15    | 0.042  | 0.250 |
| 2     | 0.263  | -0.025 | 9     | -0.184 | -0.707 | 16    | 0.047  | 0.250 |
| 3     | -0.379 | -0.245 | 10    | 0.145  | 0.234  | 17    | 0.049  | 0.251 |
| 4     | 0.253  | -0.025 | 11    | 0.146  | 0.234  | 18    | 0.046  | 0.244 |
| 5     | -0.371 | -0.245 | 12    | 0.142  | 0.234  | 19    | 0.050  | 0.244 |
| 6     | 0.256  | -0.025 | 13    | 0.042  | 0.244  | 20    | 0.052  | 0.251 |
| 7     | -0.154 | -0.707 | 14    | 0.044  | 0.251  | 21    | 0.051  | 0.251 |

**Table S13:** Prediction of liquid densities (g/l) at P = 1 bar using the new parameter set.

| Solute | T/K | $\rho^{calc}$  | AAD (%) | T/K | $\rho^{calc}$  | AAD (%) | T/K | $\rho^{calc}$  | AAD (%) |
|--------|-----|----------------|---------|-----|----------------|---------|-----|----------------|---------|
| BZ     | 294 | 920.81         | 5.0     | 313 | 900.89         | 5.0     | 347 | 864.59         | 5.1     |
| MB     | 293 | 891.78         | 2.6     | 311 | 873.63         | 2.5     | 345 | 840.36         | 2.5     |
| EB     | 292 | 879.66         | 1.1     | 311 | 862.77         | 1.2     | 344 | 832.81         | 1.4     |
| PB     | 291 | 876.55         | 1.3     | 309 | 861.21         | 1.4     | 343 | 832.87         | 1.6     |
| BB     | 290 | 876.61         | 1.5     | 309 | 861.71         | 1.5     | 342 | 834.94         | 1.7     |
| PeB    | 289 | 873.41         | 1.4     | 308 | 858.97         | 1.4     | 341 | 833.22         | 1.3     |
| OX     | 291 | 896.16         | 1.6     | 309 | 879.67         | 1.5     | 343 | 850.61         | 1.4     |
| MX     | 291 | 880.09         | 1.6     | 309 | 864.05         | 1.5     | 342 | 835.42         | 1.6     |
| PX     | 291 | 875.86         | 1.5     | 309 | 860.23         | 1.5     | 342 | 831.99         | 1.6     |
| TMB    | 289 | 889.19         | 2.3     | 308 | 874.50         | 2.4     | 340 | 847.92         | 2.6     |
|        |     | <i>Overall</i> | 2.0     |     | <i>Overall</i> | 2.0     |     | <i>Overall</i> | 2.1     |

**Table S14:** Prediction of vaporization enthalpies (kJ/mol) at P = 1 bar using the new parameter set.

| Solute         | T/K | $\Delta_{\text{vap}}H^{\text{exp}}$ | $E^{\text{Gas}}$ | $E^{\text{Liq}}$ | $\Delta_{\text{vap}}H^{\text{sim}}$ | AAD<br>(kJ/mol) |
|----------------|-----|-------------------------------------|------------------|------------------|-------------------------------------|-----------------|
| BZ             | 313 | 33.0                                | 102.4            | 69.1             | 35.9                                | 2.9             |
| MB             | 311 | 37.4                                | 100.0            | 64.9             | 37.7                                | 0.3             |
| EB             | 311 | 41.5                                | 121.8            | 83.8             | 40.6                                | 1.0             |
| PB             | 309 | 46.6                                | 129.5            | 87.2             | 44.9                                | 1.7             |
| BB             | 309 | 49.9                                | 137.9            | 91.0             | 49.5                                | 0.4             |
| PeB            | 308 | 54.8                                | 145.9            | 94.9             | 53.7                                | 1.2             |
| OX             | 309 | 42.9                                | 97.2             | 58.6             | 41.2                                | 1.7             |
| MX             | 309 | 42.2                                | 97.2             | 59.1             | 40.6                                | 1.6             |
| PX             | 309 | 41.7                                | 97.2             | 59.4             | 40.4                                | 1.3             |
| TMB            | 308 | 46.9                                | 94.6             | 52.6             | 44.6                                | 2.3             |
| <i>Overall</i> |     |                                     |                  |                  |                                     | 1.4             |

**Table S15:** Prediction of benzene dielectric constant ( $\epsilon$ ) using different parameter sets.

| Model     | $\epsilon^{\text{calc}}$ | $\epsilon^{\text{calc}} \times \epsilon_{\infty}$ | $\epsilon^{\text{exp}}$ |
|-----------|--------------------------|---------------------------------------------------|-------------------------|
| TraPPE-EH | 1.016                    | 2.29                                              | 2.28                    |
| GROMOS-EH | 1.046                    | 2.36                                              |                         |
| OPLS-AA   | 1.028                    | 2.32                                              |                         |
| New Model | 1.013                    | 2.28                                              |                         |

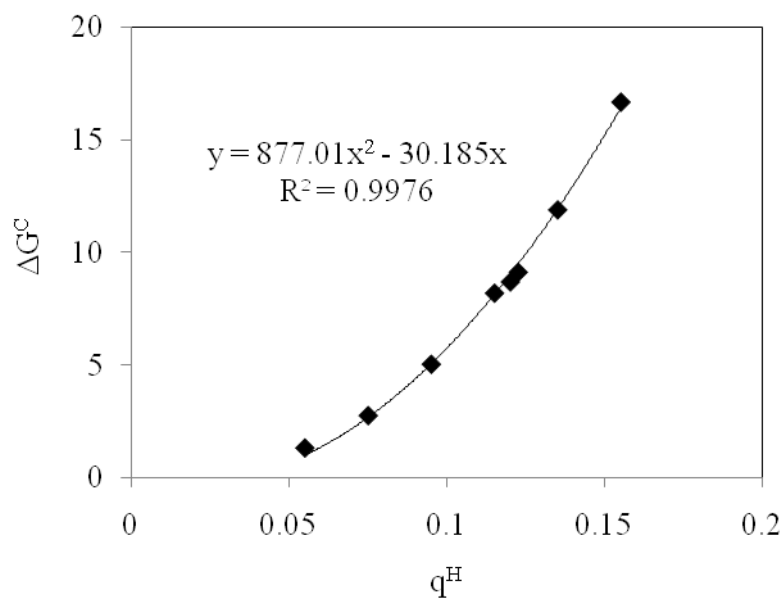

**Figure S1:** Correlation between  $\Delta G^C$  (kJ/mol) and aromatic hydrogen point charges for BZ (the charge on the aromatic carbon is always symmetric to the hydrogen charge).

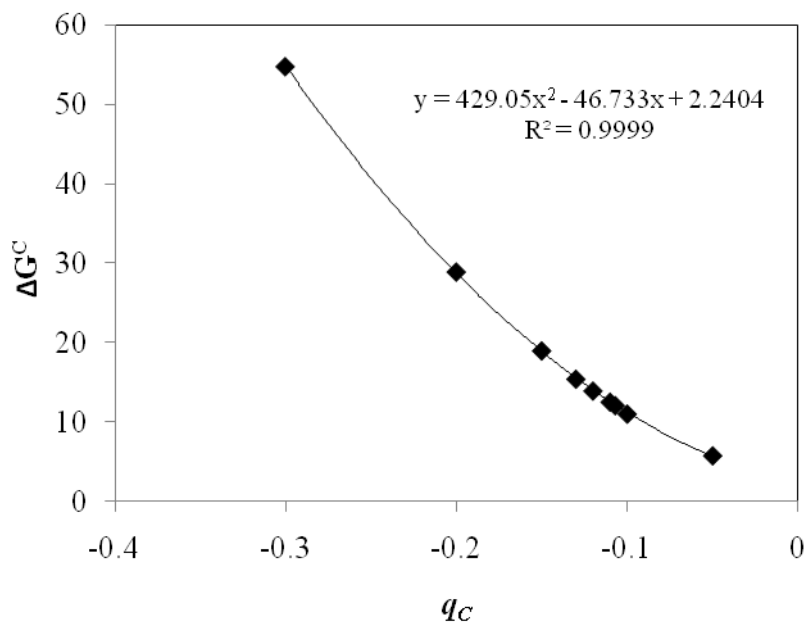

**Figure S2:** Correlations between  $\Delta G^C$  (kJ/mol) for TMB and different point charges on the substituted aromatic carbon atom (remaining charges are kept equal to their corresponding values in BZ).

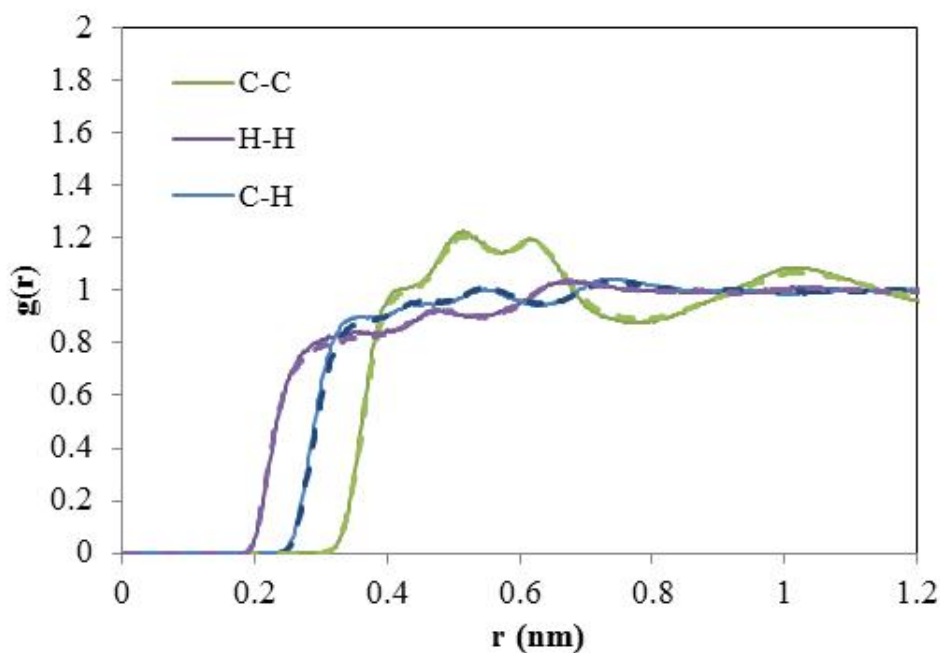

**Figure S3:** Benzene liquid structure: computed  $C_{aro} - C_{aro}$  (aromatic carbon – aromatic carbon),  $H_{aro} - H_{aro}$  (aromatic hydrogen – aromatic hydrogen) and  $C_{aro} - H_{aro}$  (aromatic carbon – aromatic hydrogen) radial distribution functions at 298 K using the new charge set (solid lines) and the original TraPPE-EH parameters (dashed lines).

**Tutorial:** How to assign charges for **1,2,4-TMB** using the rule:

- 1) Assign each site (Carbon, Hydrogen or  $\text{CH}_x$ ) to its corresponding position in the diagram of Figure 2.
- 2) For each site, determine the total number of substituents ( $N_j$ ) on each position  $j$  (0 for the current C/H atoms, 1 for C/H atoms in ortho position, 2 for C/H atoms in meta position, and 3 for C/H atoms in para position). Recall that the maximum value of  $N$  is 1 for  $j=0,3$  and 2 for  $j=1,2$ .
- 3) Compute the charge on each site by applying equation (4) and the charge increments of Table 4.

The table below shows the number of substituents and the total charge on each site of the 1,2,4-TMB molecule.

| Atom          | $N_0$ | $N_1$ | $N_2$ | $N_3$ | $q$     |
|---------------|-------|-------|-------|-------|---------|
| $C_1$         | 1     | 1     | 1     | 0     | -0.1082 |
| $C_2$         | 1     | 1     | 0     | 1     | -0.1160 |
| $C_3$         | 0     | 1     | 2     | 0     | -0.1135 |
| $C_4$         | 0     | 1     | 1     | 1     | -0.1213 |
| $C_5$         | 1     | 0     | 1     | 1     | -0.1148 |
| $C_6$         | 0     | 2     | 1     | 0     | -0.1147 |
| $\text{CH}_7$ | 1     | 1     | 1     | 0     | 0.1100  |
| $\text{CH}_8$ | 1     | 1     | 0     | 1     | 0.1102  |



|           |   |   |   |   |                   |
|-----------|---|---|---|---|-------------------|
| $H_9$     | 0 | 1 | 2 | 0 | 0.1193            |
| $H_{10}$  | 0 | 1 | 1 | 1 | 0.1195            |
| $CH_{11}$ | 1 | 0 | 1 | 1 | 0.1125            |
| $H_{12}$  | 0 | 2 | 1 | 0 | 0.117             |
|           |   |   |   |   | $\Sigma = 0.0000$ |

Below are two examples of application of equation (4) to calculate the charge on the carbon atom at position 1 and on the  $CH_x$  pseudo-atom at position 7.

**Example:**  $q_{C_1} = -0.1225 + 1*0.0087 + 1*0.0022 + 1*0.0034 - 0*0.0044 = -0.1082$

$$q_{CH_7} = 0.1225 - 1*0.0096 - 1*0.0026 - 1*0.0003 - 0*0.0001 = 0.1100$$
